1     **The use of autologous skeletal muscle derived cells as a sling in**  
2             **the treatment of induced stress urinary incontinence, an**  
3                     **experimental study**

4  
5     Bassem S. Wadie, Professor of urology, voiding dysfunction and  
6     reconstruction

7     Haytham G. Amer, Veterinarian, Research lab.

8     Sherry M. Khater, Pathologist, Pathology lab.

9     Mahmoud M. Gabr, Research scientist, Research lab.

10    Urology and Nephrology Center, Mansoura University, Mansoura, EGYPT

11

12    Corresponding author: Bassem S Wadie, MSc, MD

13    Professor of urology; Director

14    Urology and Nephrology Center, Mansoura university

15    Gomhorria st., Mansoura, EGYPT

16    Email: [bwadie@aol.com](mailto:bwadie@aol.com)

17             [Bassem\\_wadie@mans.edu.eg](mailto:Bassem_wadie@mans.edu.eg)

18    Financial disclaimer/conflict of interest: None

19    Bassem S Wadie: Conception of the study, surgical procedure, performing  
20    urodynamics and drafting of the manuscript

2

21 Haytham G Aamer: Animal care, assisting in the surgical procedure, and  
22 performing urodynamics

23 Sherry M Khater: Histopathology

24 Mahmoud Gabr: In-vitro propagation of myoblasts, preparation of the  
25 scaffolds

26 Word count (manuscript): 2257

27 Word count (Abstract): 249

28 **Abstract:**

29 Introduction & hypothesis:

30 This is an experimental pre-clinical study testing for the applicability of  
31 autologous skeletal muscle derived cells as a seeded sling for the treatment  
32 of SUI in the canine model

33 Methods:

34 10 Mongrel dogs: In 4, skeletal muscle biopsy was harvested from Biceps  
35 Femoris. 1 month later, incontinence was induced in 8 dogs through surgical  
36 disruption of the pubourethral ligaments. Muscle biopsy was incubated in  
37 DMEM medium and after expansion for 8 weeks, MDCs were collected.  
38 PGA scaffold was immersed in culture medium, coated with matrigel and  
39 cells were seeded. The sling was placed suburethrally in 8 dogs; 2 of which  
40 were cell- seeded and 4 had the scaffold only.

41 Urethral pressure (UP) measurement was done at baseline and 2 weeks after  
42 insertion of the sling.

43 The urethra with its surrounding was harvested 4 weeks after sling insertion  
44 for histopathology. 2 dogs were considered as control, in which no  
45 urethrolysis or insertion of slings were carried out

46 Results:

47 UP show increase of maximum urethral pressure during static measurement  
48 in all dogs with a scaffold inserted. The increase ranged from 5-40 cmH<sub>2</sub>O  
49 (Median 23 cmH<sub>2</sub>O)

4

50 Histopathology shows significant periurethral proliferation of skeletal  
51 muscles in 4 dogs with cell-seeded scaffold, as demonstrated by Desmin.  
52 This was maximum in dogs # 1& 2. This was not the case in the 4 dogs that  
53 had PGA sling only.

54 Conclusion: The use of skeletal muscle –seeded PGA scaffold is a practical  
55 technique with preserved integrity of histological differentiation in canine  
56 model at short term.

57 Key words: sling, skeletal muscle, dogs, incontinence

58 Brief Summary: Autologous Skeletal muscle-derived cells could be  
59 propagated in vitro and seeded to PGS scaffolds and used as slings

60

## 61 **Introduction:**

62 Treatment of stress incontinence is challenging<sup>1</sup>. Different techniques  
63 evolved throughout clinical trials<sup>2</sup>. So far, no procedure could be considered  
64 “gold”. However, a midurethral sling (MUS) is the most widely used  
65 procedure and is considered as the standard of care in women with stress  
66 incontinence<sup>3</sup>. Synthetic MUS are not without risks and sometimes could be  
67 life- threatening<sup>4</sup>. Many trials, both experimental and human, attempted to  
68 provide an autologous, efficacious and durable tissue-engineered sling.

69 This study evaluates a biodegradable *seeded Polyglcolic acid (PGA)*  
70 *scaffold* enriched with autologous muscles, so as to produce a sling without  
71 the need for a harvesting procedure such as that implemented in rectus fascia  
72 sling<sup>5</sup>, being the prototype of autologous slings<sup>6</sup>.

## 73 **Materials and methods:**

74 The study comprised 10 Mongrel female dogs. Approval from the  
75 local Ethics Committee was obtained. Open episiotomy was carried out 2  
76 weeks prior to the study to facilitate the vaginal approach.

77 Group 1 comprises 4 dogs in which a cell-seeded sling was applied  
78 while in group 2, only the PGA sling was applied.

## 79 **Isolation and expansion of muscle-derived cells (MDCs):**

80 In 4 dogs (group 1), muscle biopsy was harvested from biceps under  
81 general anesthesia. Obtained biopsy averaged 0.2 gm and was incubated in  
82 *0.2% collagenase type 1A in Dulbecco's Modified Eagle Medium (DMEM)*  
83 *medium for 20 minutes at 37 C.* (Sigma-Aldrich®, St. louis, USA) digestion.  
84 Cells were cultured on laminin-coated tissue culture flasks in SKGM-2

85 medium (Lonza®, Walkersville, MD). Medium was replaced every 3 days.

86 At confluence, cells were passaged and split 1:2 in tissue culture flasks.

87 After 8 weeks and 4 passages, MDCs were collected for transplantation.

88 • **Characterization of MDCs:**

89 Morphology of cells was evaluated using phase-contrast  
90 microscopy. The expression of Desmin was assessed by  
91 immunohistochemistry (IHC), using monoclonal anti-Desmin  
92 antibodies (DakoCytomation®, Glostrup, Denmark).

93 • **Cell seeding on scaffolds:**

94 Neoveil absorbable PGA sheet (Gunze Limited®, Kyoto,  
95 Japan) was used as (2x3 cm) segments. Seeding started by immersion  
96 in culture medium supplemented with 10 % fetal bovine serum and 1  
97 % penicillin/streptomycin for 24 h. at 37 ° C before seeding. The  
98 scaffold was coated with matrigel and MDCs were seeded at a  
99 concentration of 1 million cells/ cm<sup>2</sup>. After 24 h. the seeding side was  
100 flipped and the other side was treated the same way. Both surfaces  
101 were fully immersed in medium during seeding process. Seeded  
102 scaffold was cultured for further 3 days in the same culture medium

103 • **Induction of incontinence:**

104 One month after biopsy, incontinence was induced in 8 dogs through  
105 midline suprapubic incision and identification of the urethra and bladder.  
106 Sharp dissection of the urethra all around until disruption of the  
107 periurethral sphincter is achieved. This method is similar to that  
108 previously described by Rodriguez et al<sup>7</sup>, with the addition of  
109 pubourethral ligament disruption.

- 110 • Two weeks after induction of incontinence, sling was applied through  
111 vaginal incision in suburethral position in all 8 dogs: Cell- seeded  
112 scaffold in the first 4 and scaffold – only in the other 4. The sling is  
113 fixed to the periurethral tissue. Urethral pressure (UP) measurement  
114 was done before (baseline) and 2 weeks after insertion of the sling.
- 115 • The urethra with its surrounding was harvested and dogs were  
116 sacrificed 4 weeks after sling insertion. Figure 1 shows the scaffold  
117 and steps of surgical procedure
- 118 • The urethra was fixed in 10 % buffered formalin and processed in  
119 paraffin blocks, sectioned at 5  $\mu$ m and stained with hematoxylin and  
120 eosin (H&E), methenamine silver (for reticuline fibers detection) and  
121 Masson trichrome stain (for fibrosis detection and muscle bundles  
122 delineation).
- 123 • 2 dogs were considered as control, in whom no urethrolysis or  
124 insertion of slings were carried out. UP was carried out in these dogs  
125 before being sacrificed and their urethra was taken as control.
- 126 • For IHC, desmin antibodies were used (Abcam, Cambridge, UK) at  
127 dilution of 1:100. Nerve fibers were identified through staining with  
128 polyclonal anti-S100 (DAKO, Carpinteria, CA) at a dilution of 1:200.  
129 Immunolabeling was performed using an avidin–biotin detection kit  
130 (Vectastain Elite ABC, Vector, Burlingame, CA). All sections were  
131 counterstained with Gill’s hematoxylin.

132 A flowchart for the research procedures was supplemented (Supplement)

133 **Results:**

134 • UP shows increase of maximum urethral pressure in all dogs with a  
135 scaffold inserted. Table 1 demonstrates change in UP over time. The  
136 increase in maximum urethral closure pressure (MUCP) ranged from  
137 12-60 cmH<sub>2</sub>O (Median 40.25 cmH<sub>2</sub>O) in the first 4 dogs, where the  
138 scaffold was seeded with skeletal muscle cells. In the scaffold -only  
139 group, the increase of MUCP ranged from -3 to 18 (median 5.5  
140 cmH<sub>2</sub>O)

141 • Histopathology:

142 Luminal diameter, lining epithelium, lamina propria thickness with its  
143 elastic and collagenous fibers content (normally about 70% of whole  
144 sphincter thickness), fibrous tissue deposition and thick walled veins  
145 condition (stratum cavernosum), smooth and striated muscle(both  
146 constituting about 30% of total urethral thickness)<sup>8</sup> were assessed.

147 In group 1: urethral lumen was slightly dilated in comparison to the  
148 control group; mucosal lining is of near normal thickness. Lamina  
149 propria is slightly thicker and no evidence of fibrous tissue deposition as  
150 evidenced with Masson trichrome. Reticular fibres are the same as in  
151 control group. Thick walled veins are mildly increased in number and  
152 caliber compared to control group. The overall muscle layer appears as  
153 lavender red bundles in Masson trichrome are normal in thickness with  
154 some degree of crowding and disorganization. Areas of newly formed  
155 muscle bundles with central nuclei were confirmed.

156 In group 2 (scaffold only):

157 The damaged sphincter shows mildly dilated luminal area, with  
158 atrophic urothelial lining. The lamina propria thickness is increased with



159 moderate fibrous tissue deposition in addition to lower reticular fiber  
160 content and mild inflammatory lymphocytic infiltrate. The vascular  
161 component is unremarkable. There is substantial loss of muscle layer  
162 with an overall decreased wall thickness.

163 IHC for anti-desmin shows significantly higher sphincter muscle mass  
164 in seeded scaffold specimens as compared to the other group. Newly  
165 formed muscle bundles are wider and more randomly aligned, compared  
166 to normal sphincter. Staining for S100 shows the presence of nerve fibers  
167 between the regenerated sphincter muscles. Figure 2 and 3 shows  
168 histopathological changes in the two groups.

## 169 **Discussion:**

170 Induction of incontinence by urethrolisis with pubourethral ligament  
171 injury was our approach of choice. It resulted in disruption of the native  
172 support of the urethra and durable loss of urethral resistance<sup>9</sup>. Incontinence  
173 was confirmed by lower maximum urethral closure pressure as compared to  
174 control dogs, in which no urethrolisis was carried out

175 Myoblasts have been used as a treatment of stress incontinence in  
176 animal model by means of intra-urethral injection<sup>10</sup>. In 2014, a similar  
177 approach was used in adult 35 women. Gras et al<sup>11</sup> described a technique  
178 performed largely under local anesthesia/intravenous analgesia. An open  
179 muscle biopsy was obtained from vastus lateralis muscle and was “minced”  
180 and injected as a suspension in the same session via periurethral route in 35  
181 women; under vaginal US. Cure/improvement was noted in 7% to 63% of  
182 the patients.

183 Other human trials entailed intraurethral injection of muscle-derived  
184 stem cells were published, both in adult women<sup>12</sup> and in children<sup>13</sup>. Although  
185 results were promising, some reports turned out to be unfounded<sup>14</sup>.

186 Another research strategy involved making a structured skeletal  
187 muscle tissue in vitro, with the potential of making an all- autologous sling.  
188 Many studies evolved to reconstruct skeletal muscle tissue. Some focused on  
189 developing a self-organizing tissues, without artificial scaffolds<sup>15</sup>; others  
190 preferred seeding cells on a natural or a synthetic biodegradable substrates  
191 e.g. collagen matrices<sup>16</sup>

192 We preferred Polyglycolic acid as a biodegradable scaffold as it was  
193 used by Saxena et al<sup>17&18</sup> where myoblasts derived from neonatal rats,  
194 Fisher CDF-F344, were seeded onto polyglycolic acid meshes and implanted  
195 into the omentum of syngeneic adult Fisher CDF-F344 rats with promising  
196 results and comprehensive description of the approach. The advantage of the  
197 sling approach is that it applies potentially successful technique<sup>19</sup> with an  
198 added effect of autologous skeletal muscle fibers to the mid-urethra

199 To our knowledge, no human study involving biodegradable sling  
200 seeded with autologous muscle-derived cells was yet reported. Such a study  
201 will be of paramount importance, considering that the current treatment  
202 options of women with SUI are far from optimum<sup>20</sup>

203 The question we tried to answer is whether muscle-seeded  
204 biodegradable scaffold is any different from plain one? So, we compared  
205 absorbable sling to sling seeded with autologous muscle cells.

206 Cell -seeded sling proved to be more efficacious than plain PGA.  
207 Urethral pressure measurement 6 weeks after sling insertion showed that the

208 median increase of urethral closure pressure in the cell-seeded sling was  
209 over 40 cm H<sub>2</sub>O while in the other group where only PGA sling was applied,  
210 it was 5.5 cmH<sub>2</sub>O

211 Histopathological study of harvested urethral segments 4 weeks after  
212 insertion of slings proved the persistence of viable skeletal muscle and nerve  
213 fibres.

214 This sling design avoids polypropylene-related adverse events.  
215 Application of this technique in humans is easy and promising, based on  
216 functional and urodynamic outcome.

217 One of the shortcomings of our study is the measurement of  
218 maximum urethral pressure in female dogs might not be very reproducible.  
219 This is probably true according to one study<sup>21</sup>; yet, others<sup>22</sup> have adopted the  
220 same parameter we used

221 **Conclusion:**

222 A biodegradable PGA sling seeded with autologous myoblasts shows  
223 evidence of survival 6 weeks after insertion in dogs. The use of skeletal  
224 muscle –seeded PGA scaffold is a practical technique with preserved  
225 histological differentiation in canine model at short term.

226 **Funding:** Institutional

227 **Conflicts of interest/Competing interests:** None for any of the authors

229 **References:**

- 
- <sup>1</sup> Nadeau G, Herschorn S.( 2014): Management of recurrent stress incontinence following a sling. *Curr Urol Rep.*, 15(8):427
  - <sup>2</sup> Hinoul P, Roovers JP, Ombelet W, Vanspauwen R.( 2009): Surgical management of urinary stress incontinence in women: a historical and clinical overview. *Eur J Obstet Gynecol Reprod Biol.* 145(2):219-225
  - <sup>3</sup> Abrams P, Andersson KE, Birder L et al (2010): Fourth international consultation on incontinence recommendations of the international scientific committee: evaluation and treatment of urinary incontinence, pelvic organ prolapse, and fecal incontinence. *Neurourol.Urodyn.* 29(1):213-240
  - <sup>4</sup> Daneshgari F, Kong W, Swartz M. (2008): Complications of mid urethral slings: Important outcomes for future clinical trials. *J Urol.* 180(5):1890-1897
  - <sup>5</sup> Wadie BS, Edwan A, Nabeeh AM. (2005): Autologous fascial sling vs. polypropylene tape at short-term followup: a prospective randomized study. *J Urol.* 174(3):990-993
  - <sup>6</sup> Blaivas JG, Simma-Chiang V, Gul Z, Dayan L et al (2019): Surgery for stress Urinary Incontinence : Autologous Fascial Sling. *Urol Clin North Am.* 46(1):41-52
  - <sup>7</sup> Rodríguez LV, Chen S, Jack GS, et al (2005): New objective measures to quantify stress urinary incontinence in a novel durable animal model of intrinsic sphincter deficiency. *Am J Physiol Regul Integr Comp Physiol.* 288(5):R1332-8
  - <sup>8</sup> Eberli,D, Aboushwareb, T., Soker, S et al (2012): Muscle Precursor Cells for the Restoration of Irreversibly Damaged Sphincter Function, *Cell Transplantation.* 21 (9), 2089-2098
  - <sup>9</sup> Sajadi KP, Gill BC, Damaser MS. (2010): Neurogenic aspects of stress urinary incontinence. *Curr Opin Obstet Gynecol.* 22(5):425-429
  - <sup>10</sup> Chancellor MB, Yokoyama T, Tirney S et al (2000): Preliminary results of myoblast injection into the urethra and bladder wall: a possible method for the treatment of stress urinary incontinence and impaired detrusor contractility. *Neurourol Urodyn.* 19(3):279-287
  - <sup>11</sup> Gräs S, Klarskov N, Lose G. (2014): Intraurethral injection of autologous minced skeletal muscle: a simple surgical treatment for stress urinary incontinence. *J Urol.* 192(3):850-855
  - <sup>12</sup> Carr LK, Steele D, Steele S, et al (2008): 1-year follow-up of autologous muscle derived stem cell injection pilot study to treat stress urinary incontinence. *Int Urogynecol J Pelvic Floor Dysfunct.* 19:881-883

- 
- <sup>13</sup> Kajbafzadeh AM, Elmi A, Payabvash S, et al (2008): Transurethral myoblast injection for treatment of urinary incontinence in children with classic bladder exstrophy. *J Urol.* 180:1098-1105
- <sup>14</sup> Kleinert S, Horton R. (2008): Retraction—Autologous myoblasts and fibroblasts versus collagen [corrected] for treatment of stress urinary incontinence in women: A [corrected] randomised controlled trial. *Lancet.* 372: 789790
- <sup>15</sup> Dennis RG, KosnikP, Gilbert ME et al (2001): Excitability and contractility of skeletal muscle engineered from primary cultures and cell lines. *Am J Physiol Cell Physiol.* 280:C288-95
- <sup>16</sup> KosnikJr P, Dennis RG, Faulkner JA. ( 2001) : Functional development of engineered skeletal muscle from adult and neonatal rats. *Tissue Eng.* 7(5):573-584
- <sup>17</sup> Saxena AK, Marler J, Benvenuto M, et al (1999): Skeletal muscle tissue engineering using isolated myoblasts on synthetic biodegradable polymers: preliminary studies. *Tissue Eng.* 5(6):525-532
- <sup>18</sup> Saxena AK, Willital GH, Vacanti JP. (2001): Vascularized three dimensional skeletal muscle tissue-engineering. *Biomed Mater Eng.* 11(4):275-281
- <sup>19</sup> Richter, H. E., Albo, M. E., Zyczynski, H. M., et al (2010): Retropubic versus transobturator midurethral slings for stress incontinence. *N Eng J Med.* 362(22): 2066-2076
- <sup>20</sup> Albo ME, Richter HE, Brubaker L, et al (2007): Burch Colposuspension versus Fascial Sling to Reduce Urinary Stress Incontinence *N Engl J Med.* 356(21):2143-2155
- <sup>21</sup> Holt PE (1989): 'Simultaneous' urethral pressure profilometry in the bitch: methodology and reproducibility of the technique. *Res Vet Sci.* 47(1):110-116
- <sup>22</sup> Claeys S, de Leval J, Hamaide A. (2010): Transobturator vaginal tape inside out for treatment of urethral sphincter mechanism incompetence: preliminary results in 7 female dogs. *Vet Surg.* 39(8):969-979.

---

Legend of figures:

Figure 1: A) Double -faced seeded scaffold in sterile medium. B) Midline vaginal incision with distal 2/3 of the dog urethra completely exposed, c) PGA sling is attached to the periurethral tissue using 5/0 Vicryl, D) Whole urethra is dissected from the surrounding, and harvested

Figure 2: A) Diffuse increase in thickness of skeletal muscle bundles with mild disorganization in PGA seeded with MDC using IHC for desmin stain (brown), B) Minimal increase in thickness of skeletal muscle bundles in PGA only using IHC for desmin stain (brown), C) Abundant nerve fibers in between muscle bundles in PGA seeded with MDC using IHC for S100 stain (brown), D) Minimal increase in nerve fibers in between muscle bundles in PGA only using IHC for S100 stain (brown)

Figure 3: A) Venous plexus is increased in number with marked congestion and mild edema in PGA seeded with MDC, D) Venous plexus is near normal in number with mild congestion with mild inflammatory infiltrate in PGA only, B) Silver stain shows near normal amount of reticular fibers (black) in PGA seeded with MDC, E) Silver stain shows lower amount of reticular fibers (black) in PGA only, C) The lamina propria expressed absent fibrous tissue (blue) in PGA seeded with MDC using Masson trichrome stain, F) The lamina propria showed diffuse moderate fibrous tissue (blue) in PGA only using Masson trichrome stain

Supplementary figure: Flowchart of the study procedures

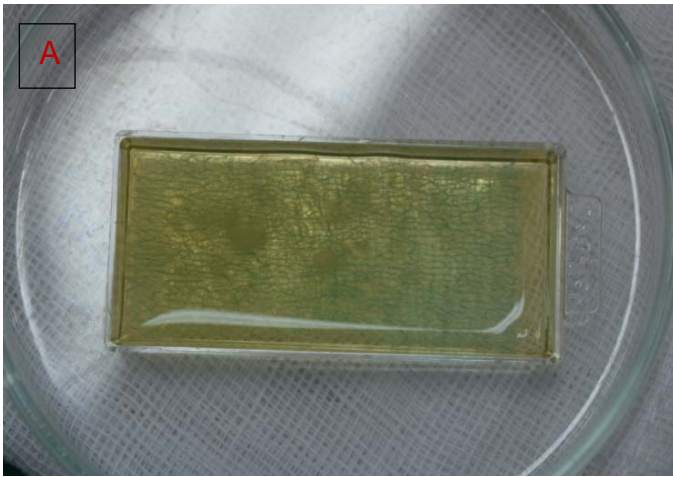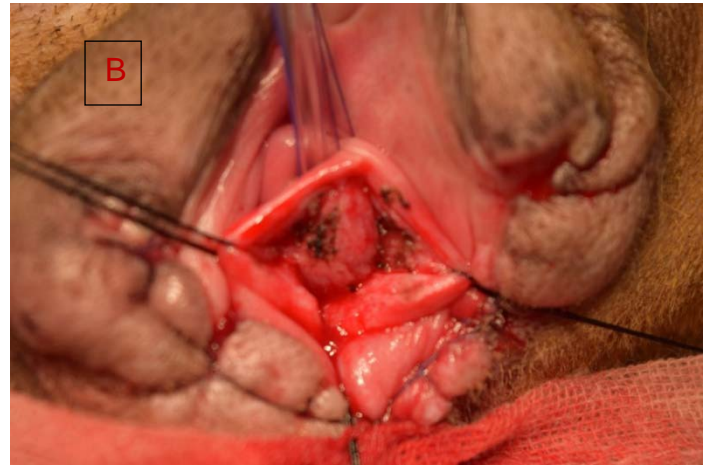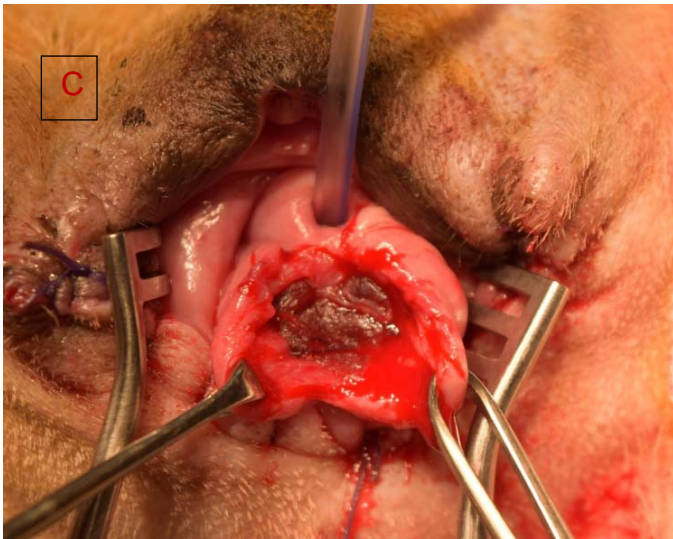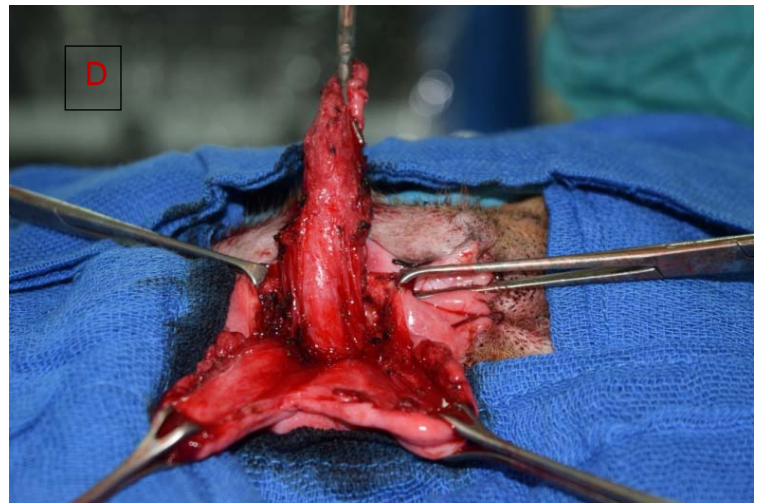

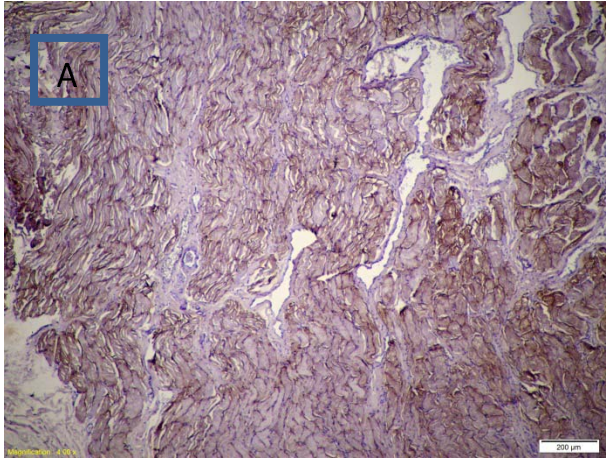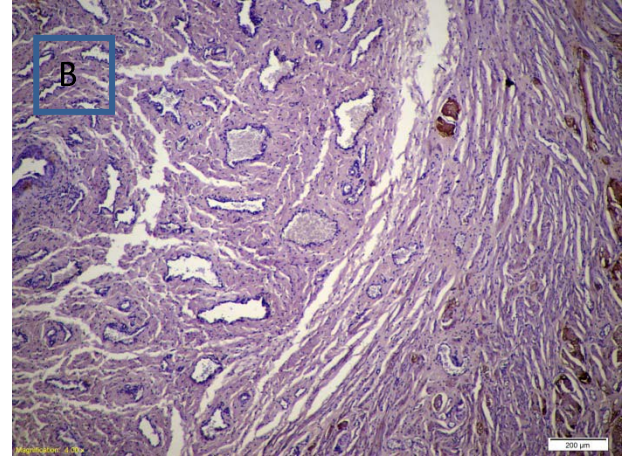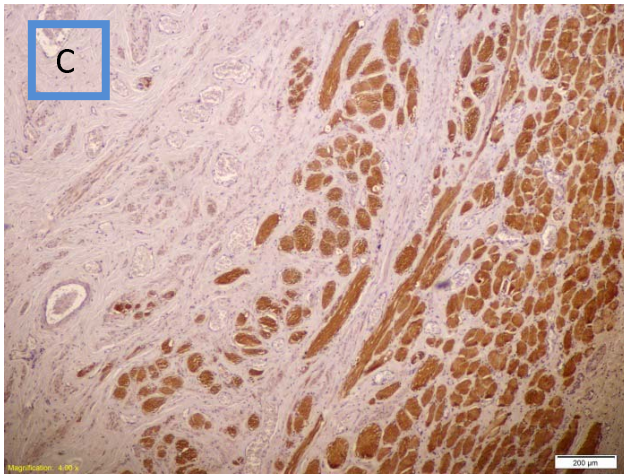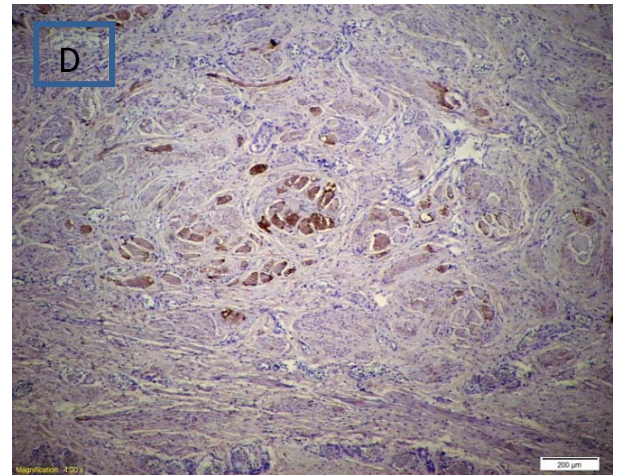



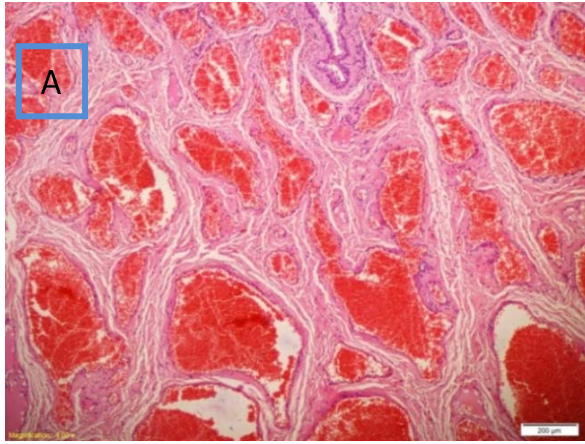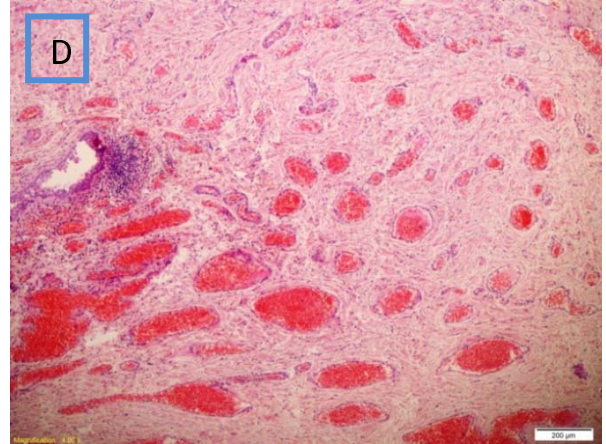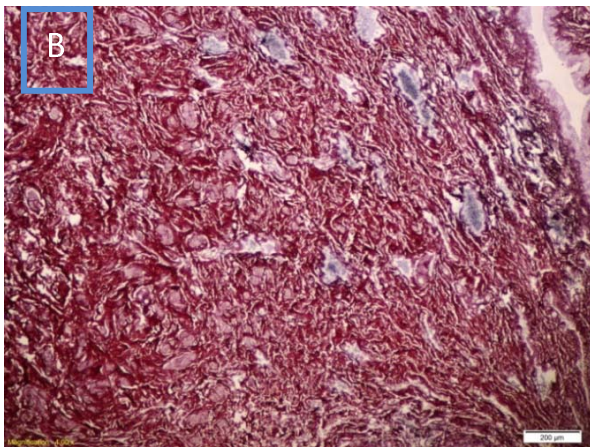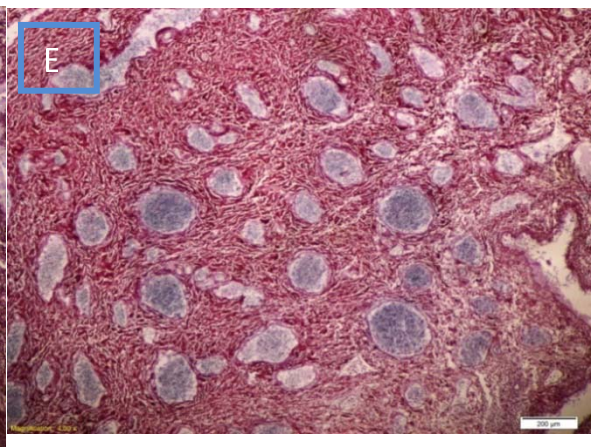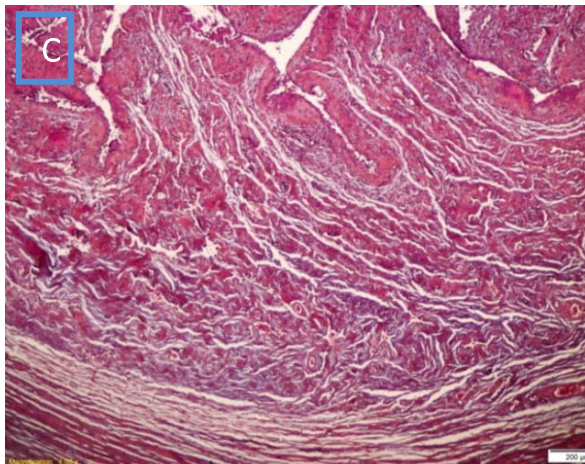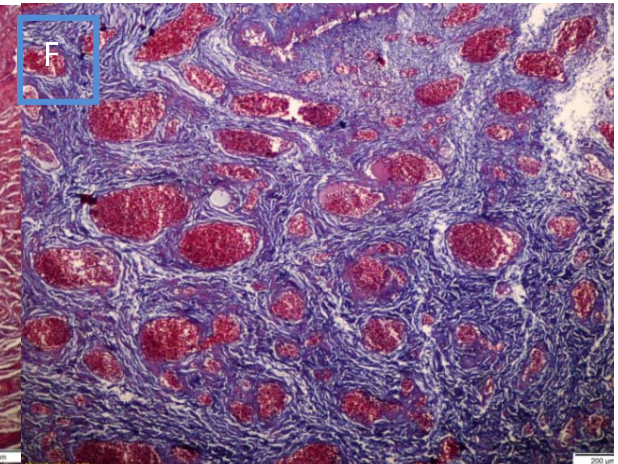

**Table 1: Maximum urethral closure pressure (MUCP) in all dogs**

| <b>Dog#</b> | <b>Baseline (cmH2O)</b> | <b>2- week after sling (cmH2O)</b> |
|-------------|-------------------------|------------------------------------|
| 1           | 25                      | 40                                 |
| 2           | 32                      | 45                                 |
| 3           | 30                      | 90                                 |
| 4           | 27                      | 90                                 |
| 5           | 20                      | 38                                 |
| 6           | 21                      | 18                                 |
| 7           | 17                      | 20                                 |
| 8           | 18                      | 22                                 |
| 9           | 40                      | NA                                 |
| 10          | 44                      | NA                                 |
